# Supplementary material
Source: HighWire-hosted journal article supplement (https://openres.ersjournals.com/content/9/2/00733-2022)
Supplement: inline-supplementary-material-1 [file inline-supplementary-material-1.pdf]

Table 1S List of data contributors

| Country            | City       | Centre                                                                                                                                                                                 | No of cases |
|--------------------|------------|----------------------------------------------------------------------------------------------------------------------------------------------------------------------------------------|-------------|
| Belgium            | Leuven     | Pediatric pulmonology, KUL UZ Gasthuisberg                                                                                                                                             | 2           |
| the Czech Republic | Olomouc    | Dept. of Pediatrics, University Hospital Olomouc                                                                                                                                       | 1           |
| Denmark            | Copenhagen | Paediatric Pulmonary Service, Dept of Paediatrics and Adolescent Medicine, Copenhagen University Hospital, Rigshospitalet                                                              | 5           |
| Denmark            | Aarhus     | Danish Center of Pediatric Pulmonology and Allergology, Department of Pediatrics and Adolescents Medicine, University Hospital of Aarhus,                                              | 1           |
| England            | London     | Royal Brompton Hospital, London, United Kingdom                                                                                                                                        | 2           |
| France             | Paris      | APHP-Sorbonne Université, Pediatric Pulmonology and Reference Center for rare lung diseases RespiRare, Inserm U933 Laboratory of childhood genetic diseases, Armand Trousseau Hospital | 13          |
| France             | Lyon       | Université de Lyon, Hôpital Femme Mère Enfant, Pediatric pulmonology department                                                                                                        | 1           |
| France             | Strasbourg | Strasbourg University, Hôpital de Hautepierre, Pediatric pulmonology department                                                                                                        | 1           |
| France             | Toulouse   | Dept of Pediatric Pulmonology and Allergy, Children's University Hospital,                                                                                                             | 1           |
| Germany            | Hannover   | Clinic for Paediatric Pneumology, Allergology and Neonatology, Hannover Medical School, German Center for Lung Research (DZL)                                                          | 21          |
| Germany            | Essen      | Clinic for pediatrics III, University hospital Essen                                                                                                                                   | 12          |

|           |                   |                                                                                                                                                                                       |    |
|-----------|-------------------|---------------------------------------------------------------------------------------------------------------------------------------------------------------------------------------|----|
| Greece    | Athens            | 2nd Pulmonary Medicine Department<br>General University Hospital, Athens Medical<br>School National and Kapodistrian University<br>of Athens                                          | 2  |
| Ireland   | Dublin            | CHI at Tallaght University Hospital,                                                                                                                                                  | 1  |
| Palestine | East Jerusalem    | Pediatric department, Makassed                                                                                                                                                        | 6  |
| Poland    | Warsaw            | Department of Pediatric Pneumology and<br>Allergy, Medical University of Warsaw                                                                                                       | 9  |
| Portugal  | Lisbon            | Department of Pediatrics, Respiratory Unit.<br>Hospital de Santa Maria, Centro Hospitalar<br>Lisboa Norte                                                                             | 2  |
| Portugal  | Porto             | Departamento de Ginecologia Obstetrícia e<br>Pediatria, Faculdade de Medicina,<br>Universidade do Porto and Serviço de<br>Pediatria, Centro Hospitalar Universitário de<br>S. João    | 1  |
| Spain     | Barcelona         | Pediatric Pulmonology and Allergology<br>Department. Parc Taulí Hospital<br>Universitari, Institut d'Investigació i<br>Innovació Parc Taulí I3PT, Univesitat<br>Autónoma de Barcelona | 3  |
| Spain     | Palma de Mallorca | Pediatric pulmonology department, Son<br>Espases University Hospital                                                                                                                  | 3  |
| Spain     | Valencia          | Pediatric pulmonology. Clinical Hospital of<br>Valencia                                                                                                                               | 1  |
| Sweden    | Gothenburg        | Devison of Paediatrics, Drottning Silvias<br>barn- och ungdomssjukhus, Univercity of<br>Gothenburg                                                                                    | 9  |
| Turkey    | Ankara            | Gazi University Faculty of Medicine,<br>Department of Pediatric Pulmonology                                                                                                           | 12 |
| Turkey    | Ankara            | Hacettepe University Faculty of Medicine,<br>Department of Pediatric Pulmonology                                                                                                      | 6  |
| Turkey    | Ankara            | Department of Pediatrics, Pediatric<br>Pulmonology Division, Ankara University<br>Faculty of Medicine                                                                                 | 4  |

|        |          |                                                                               |   |
|--------|----------|-------------------------------------------------------------------------------|---|
| Turkey | Istanbul | Division of Paediatric Pulmonology,<br>Marmara University Faculty of Medicine | 3 |
|--------|----------|-------------------------------------------------------------------------------|---|

Data contributors are arranged by country in alphabetical order. The median (range) number of included patients per centre was 2 (1;21).

Table 2S. Detailed data of diagnostic workup in each sub-group

|                                                 | HRCT     |                      | BAL      |                      |                                 | Lung biopsy |                                      |                                          |                           | Echocardiography |                     | Genetic analysis |                                                                                             |
|-------------------------------------------------|----------|----------------------|----------|----------------------|---------------------------------|-------------|--------------------------------------|------------------------------------------|---------------------------|------------------|---------------------|------------------|---------------------------------------------------------------------------------------------|
|                                                 | n (%)    | GGO, n (% of tested) | n (%)    | HLM, n (% of tested) | Fresh bleeding, n (% of tested) | n (%)       | Hemochromatosis/HLM, n (% of tested) | Vasculitis/capillaritis, n (% of tested) | Fibrosis, n (% of tested) | n (%)            | PAH n (% of tested) | Tested, n (%)    | Mutation                                                                                    |
| All DAH patients<br>n =117                      | 110 (94) | 78 (71)              | 100 (85) | 74 (74)              | 28 (28)                         | 49 (42)     | 25 (51)                              | 3 (6)                                    | 8 (16)                    | 94 (80)          | 11(12)              | 52 (44)          |                                                                                             |
| IPH<br>n=36                                     | 34 (94)  | 23 (68)              | 29 (81)  | 25 (86)              | 9 (31)                          | 15 (42)     | 10 (67)                              | 0                                        | 3 (20)                    | 29 (81)          | 2(7)                | 15 (42)          | Trisomy 21 (n=3)<br>Other <sup>s</sup> (n=1)<br>No mutation (n=11)<br>Pending (n=1)         |
| DAH associated with autoimmune features<br>n=20 | 17 (85)  | 13 (76)              | 18 (90)  | 13 (72)              | 6 (33)                          | 11 (55)     | 4 (36)                               | 0                                        | 2 (18)                    | 15 (75)          | 0                   | 11 (55)          | NKX2.1 (n=1)<br>No mutation (n=9)<br>Pending (n=1)                                          |
| Systemic and collagen diseases<br>n=18          | 18 (100) | 12 (67)              | 14 (78)  | 9 (64)               | 6 (43)                          | 4 (22)      | 3 (75)                               | 1 (25)                                   | 0                         | 15 (83)          | 1 (7)               | 3 (17)           | HLA DQA1*05 positive,<br>HLA DQB1*02 positive (n=1)<br>22q11 del (n=1)<br>No mutation (n=1) |
| Immuno-allergic diseases<br>n=10                | 9 (90)   | 7 (78)               | 9 (90)   | 7 (78)               | 1 (11)                          | 2 (20)      | 2 (100)                              | 0                                        | 0                         | 10 (100)         | 1 (10)              | 1 (10)           | No mutation (n=1)                                                                           |
| Other chILD<br>n=5                              | 4 (80)   | 3 (75)               | 5 (100)  | 4 (80)               | 2 (40)                          | 5 (100)     | 3 (60)                               | 1 (20)                                   | 1 (20)                    | 4 (80)           | 3 (75)              | 4 (80)           | STPTC (n=1)<br>NKX2.1 (n=1)<br>TBX4 (n=1)<br>Unknown (n=1)                                  |

|                                          |         |         |         |         |        |         |        |        |        |         |        |         |                                                                                                                  |
|------------------------------------------|---------|---------|---------|---------|--------|---------|--------|--------|--------|---------|--------|---------|------------------------------------------------------------------------------------------------------------------|
| Autoinflammatory<br>n=3                  | 3 (100) | 3 (100) | 3 (100) | 3 (100) | 0      | 3 (100) | 0      | 0      | 1(33)  | 2 (66)  | 1 (50) | 3(100)  | COPA (n=2)<br>STAT-3 (n=1)                                                                                       |
| Secondary to other<br>conditions<br>n=21 | 22 (88) | 18 (82) | 20 (80) | 13 (65) | 4 (20) | 9 (36)  | 2 (22) | 1 (11) | 1 (11) | 18 (72) | 3 (17) | 13 (62) | Trisomy 21 (n=2)<br>ATP7B (n=1)<br>PFIC 1 (n=1)<br>WAS (n=1)<br>FLT3-ITD (n=1)<br>WT1 (n=1)<br>No mutation (n=6) |
| Non-specified DAH<br>diagnosis =5        | 3 (75)  | 2 (67)  | 2 (50)  | NA      | NA     | 0       | 0      | 0      | 0      | 3 (75)  | 0      | 2 (50)  | CYBB (n=1)<br>Trisomy 21 (n=1)<br>No mutation (n=1)                                                              |

HRCT; High-resolution CT, BAL; Bronchoalveolar lavage, Echo; echocardiography, DAH; Diffuse alveolar haemorrhage, IPH; Idiopathic pulmonary Hemosiderosis, chILD; Childhood Interstitial Lung Disease, HLA DQA1; human leucocyte antigen DQ alpha 1, HLA DQB1; human leucocyte antigen DQ beta 1, 22q11; DeGeorges syndrome, NKX2.1; NK Homeobox 1, STPTC; surfactant protein C, TBX4; T-box transcription factor 4, COPA; COPI coat complex subunit alpha, STAT-3; Signal transducer and activator of transcription 3, ATP7B; ATPase cobber transporting beta; PFIC-1; progressive familial intrahepatic cholestasis 1, WASp; Wiscott -Aldrich Syndrome, FLT3-ITD; fms-like tyrosine kinase 3 internal tandem duplication, WT1; Wilms' tumor 1; CYBB; cytochrome B-245 beta chain. <sup>§</sup>Heterozygote for CSF2RB (colony-stimulating factor 2 receptor subunit beta) (pulmonary alveolar proteinosis).

Table 3S Autoantibodies and specific immunoglobulins

|                                               | ATA, IgA | ATA, IgG | antigliadin antibodies (AGA) | ANCA   | ANA   | Anti-endomysium antibodies (AEA) | SMA  | RF    | Cow's milk, IgG |
|-----------------------------------------------|----------|----------|------------------------------|--------|-------|----------------------------------|------|-------|-----------------|
| All DAH patients, n=117                       | 12/69    | 4/55     | 9/56                         | 17/100 | 17/96 | 5/51                             | 7/74 | 10/66 | 5/37            |
| IPH, n=36                                     | 0/22     | 1/16     | 1/20                         | 0/28   | 0/28  | 0/18                             | 0/18 | 0/21  | 0/14            |
| DAH associated with autoimmune features, n=20 | 0/13     | 0/10     | 0/9                          | 7/18   | 8/18  | 0/8                              | 4/15 | 6/13  | 1/6             |
| Systemic and collagen diseases, n=18          | 2/8      | 0/6      | 0/5                          | 10/18  | 4/16  | 1/7                              | 1/12 | 1/7   | 0/4             |
| Immuno-allergic diseases, n=12                | 7/9      | 3/9      | 6/8                          | 0/9    | 1/10  | 4/8                              | 0/8  | 1/9   | 4/6             |
| Other chILD condition, n=5                    | 1/1      | 0/1      | 0/2                          | 0/4    | 0/4   | 0/1                              | 0/2  | 0/2   | 0/1             |
| Autoinflammatory diseases, n=3                | 0/3      | 0/3      | 1/3                          | 0/3    | 2/3   | 0/1                              | 1/3  | 1/3   | 0/1             |
| Secondary to other conditions, n=21           | 2/11     | 0/9      | 1/7                          | 0/17   | 2/15  | 0/6                              | 1/14 | 1/9   | 0/5             |
| Non-specified DAH diagnosis, n=4              | 0/2      | 0/1      | 0/2                          | 0/3    | 0/2   | 0/2                              | 0/2  | 0/2   | 0               |

Results are presented as number tested positive / number tested. DAH; Diffuse alveolar haemorrhage, IPH; Idiopathic pulmonary Hemosiderosis, chILD; Childhood Interstitial Lung Disease, ATA; anti transglutaminase antibody, ANCA; antineutrophilic cytoplasmic antibodies, ANA; antinuclear antibodies, SMA; anti-double-stranded DNA and anti-smooth-muscle antibodies; RF; rheumatoid factor.

Table 4S. Results from first available pulmonary function test.

|                                               | FEV1, % pred.      | FVC, % pred.       | FEV1/FVC, % pred.   | TLC, % pred.         | DLCO, % pred.       | KCO, % pred.       |
|-----------------------------------------------|--------------------|--------------------|---------------------|----------------------|---------------------|--------------------|
| All DAH patients, n=117                       | 66 (56;86)<br>n=36 | 68 (56;86)<br>n=36 | 96 (84;106)<br>n=36 | 87 (72;106)<br>n= 34 | 69 (58;91)<br>n= 26 | 77 (67;92)<br>n=10 |
| IPH, n=36                                     | 74 (53;79)<br>n=9  | 77 (70;81)<br>n=9  | 97 (94;104)<br>n=9  | 73 (65;91)<br>n=5    | 61 (54;69)<br>n=7   | 75 (69;80)<br>n=2  |
| DAH associated with autoimmune features, n=20 | 61 (59;61)<br>n=5  | 59 (50;67)<br>n=5  | 97 (90;102)<br>n=5  | 91 (68;99)<br>n=6    | 54 (43;83)<br>n=4   | 67<br>n=1          |
| Systemic and collagen diseases, n=18          | 78 (66;85)<br>n=11 | 78 (60;86)<br>n=11 | 97 (84;106)<br>n=11 | 89 (79;104)<br>n=10  | 75 (68;94)<br>n=9   | 77 (71;85)<br>n=3  |
| Immuno-allergic diseases, n=12                | 86 (44;98)<br>n=3  | 90 (66;98)<br>n= 3 | 91 (66;106)<br>n=3  | 106 (105;106)<br>n=2 | 94 (90;97)<br>n=2   | 87 (76;98)<br>n=2  |
| Other chILD condition, n=5                    | 51 (45;57)<br>n=2  | 59 (50;68)<br>n=2  | 65<br>n=2           | 114<br>n=1           | 69<br>n=1           | NA                 |
| Autoinflammatory diseases, n=3                | 27<br>n=1          | 24<br>n=1          | 88<br>n=1           | 73<br>n=1            | 72<br>n=1           | NA                 |
| Secondary to other conditions, n=21           | 71 (63;95)<br>n= 6 | 66 (60;88)<br>n=6  | 103 (93;107)<br>n=6 | 81 (77;85)<br>n= 6   | 100 (55;113)<br>n=3 | 91 (83;98)<br>n=2  |
| Non-specified DAH diagnosis, n=4              | NA                 | NA                 | NA                  | NA                   | NA                  | NA                 |

Data is presented as median (IQ-range) unless n <5 in which case median (range) is presented. DAH; Diffuse alveolar haemorrhage, IPH; Idiopathic pulmonary Hemosiderosis, chILD; Childhood Interstitial Lung Disease, FEV1; Forced Expiratory Volume in the first second, FVC; Forced Vital Capacity, TLC; Total Lung Capacity, DLCO; the diffusion capacity for Carbon Monoxide, KCO; Carbon monoxide transfer coefficient n = the number of patients in which the data was available. NA; no data available.

Table 5S. Most frequent medical treatments besides corticosteroids, hydroxychloroquine, and azathioprine

|                                              | Non-specific immuno-suppressive drugs                  | Immuno-globulins | cytostatic                                            | Biological treatment                                        | plasmapheresis |
|----------------------------------------------|--------------------------------------------------------|------------------|-------------------------------------------------------|-------------------------------------------------------------|----------------|
| All DAH patients, n=117                      | 16 (14%)                                               | 3 (3%)           | 11 (9%)                                               | 11 (9%)                                                     | 6 (5%)         |
| IPH, n=36                                    | 3 (8%)<br>Mycophenolate mofetil, 2<br>Cyclosporine, 1  | 0                | 4 (11%)<br>6-mercaptopurine, 2<br>Cyclophosphamide, 2 | 1 (3%)<br>Rituximab, 1                                      | 0              |
| DAH associated with autoimmune features n=20 | 3 (15%)<br>Mycophenolate mofetil, 3                    | 1 (5%)           | 2 (10%)<br>Cyclophosphamide, 2                        | 2 (10%)<br>Rituximab, 1<br>Baricitinib, 1                   | 0              |
| Systemic and collagen diseases, n=18         | 8 (44%)<br>Mycophenolate mofetil, 7<br>Cyclosporine, 3 |                  | 5 (28%)<br>Methotrexate, 2<br>Cyclophosphamide, 3     | 5 (28%)<br>Rituximab, 4<br>Mepolizumab, 1                   | 6 (33%)        |
| Immuno-allergic diseases, n=10               | 0                                                      | 0                | 0                                                     | 0                                                           | 0              |
| Other ILD condition, n=5                     | 0                                                      | 1 (20%)          | 0                                                     | 1 (20%)<br>Tocilizumab                                      | 0              |
| Autoinflammatory diseases, n=3               | 0                                                      | 0                | 0                                                     | 2 (33%)<br>Baricitinib, 2<br>Canakinumab, 1<br>Rituximab, 1 | 0              |
| Secondary to other conditions, n=21          | 2 (10%)<br>Mycophenolate mofetil, 2                    | 1 (5%)           | 0                                                     | 0                                                           | 0              |
| Non-specified DAH diagnosis, n=4             | 0                                                      | 0                | 0                                                     | 0                                                           | 0              |

DAH; Diffuse alveolar haemorrhage, IPH; Idiopathic pulmonary Hemosiderosis, chILD; Childhood Interstitial Lung Disease.



Table 6S. Follow-up data: time of follow-up, chest imagining, and pulmonary function.

|                                               | Time to follow-up |                     | Follow-up HRCT or chest x-ray | Follow-up pulmonary function                               |                      |                      |                       |                      |                    |
|-----------------------------------------------|-------------------|---------------------|-------------------------------|------------------------------------------------------------|----------------------|----------------------|-----------------------|----------------------|--------------------|
|                                               | from debut, yrs   | from diagnosis, yrs |                               | follow-up HRCT or x-ray with abnormalities Assoc. with DAH | FEV1, % pred.        | FVC, % pred.         | FEV1/FVC, % pred.     | TLC, % pred.         | DLCO, % pred.      |
| All DAH patients, n=117                       | 4 (1.5;7.8)       | 3.2 (1.2;7.0)       | 60% (61/101)                  | 84 (66;97)<br>n=20                                         | 87 (69;96)<br>n=63   | 96 (86;101)<br>n=63  | 100 (85;112)<br>n=42  | 87 (66;99)<br>n=47   | 91 (83;94)<br>n=21 |
| IPH, n=36                                     | 8.8 (5.2;16.0)    | 7.4 (4.8;14.6)      | 62% (18/29)                   | 74 (66;93)<br>n=17                                         | 79 (68;87)<br>n=17   | 91 (86;97)<br>n=17   | 99 (95;112)<br>n=9    | 83 (70;93)<br>n=14   | 87 (73;99)<br>n=7  |
| DAH associated with autoimmune features, n=20 | 4.4 (3.1;7.0)     | 3.9 (1.7;9.4)       | 68% (13/19)                   | 61 (60;73)<br>n=11                                         | 70 (60;78)<br>n=11   | 86 (82;98)<br>n=11   | 85 (74;94)<br>n=9     | 71 (53;83)<br>n=8    | 89<br>n=2          |
| Systemic and collagen disorders, n=18         | 3.7 (1.8;5.5)     | 3.4 (1.7;5.0)       | 56% (9/16)                    | 99 (94;112)<br>n=16                                        | 101 (95;116)<br>n=16 | 97 (95;99)<br>n=16   | 108 (103;120)<br>n=11 | 100 (85;113)<br>n=14 | 98 (86;122)<br>n=4 |
| Immuno-allergic disorders, n=10               | 5.0 (2.6;7.0)     | 3.8 (1.3;6.3)       | 55% (5/9)                     | 87 (71;103)<br>n=8                                         | 88 (86;98)<br>n= 8   | 85 (77;100)<br>n=8   | 114 (105;129)<br>n=4  | 92 (60;120)<br>n=4   | 88 (66;114)<br>n=4 |
| Other chILD, n=5                              | 1.5 (0.9;6.9)     | 1.5 (0.9;7.3)       | 60% (3/5)                     | 83 (30;95)<br>n=3                                          | 92 (30;93)<br>n=3    | 107 (88;108)<br>n=3  | 124 (108;140)<br>n=2  | 93 (82;103)<br>n=2   | 78<br>n=1          |
| Autoimmune disorders, n=3                     | 13.0 (12.8;17.8)  | 11.0 (5.8;14.9)     | 100% (2/2)                    | 44 (23;64)<br>n=2                                          | 42 (21;62)<br>n=2    | 100 (61;106)<br>n=2  | 58 (39;76)<br>n=2     | NA                   | NA                 |
| Secondary to other conditions, n=21           | 2.4 (1.8;3.0)     | 2.3 (1.7;3.4)       | 44% (8/18)                    | 93 (81;96)<br>n= 11                                        | 87 (77;95)<br>n=11   | 101 (93;108)<br>n=11 | 90 (81;100)<br>n= 4   | 87 (55;97)<br>n=2    | 91 (74;95)<br>n=3  |
| Non-specified DAH diagnosis, n=4              | 4.5 (0.7;32.4)    | 4.4 (0.6;32.4)      | 50% (2/4)                     | 72<br>n=1                                                  | 69<br>n=1            | 104<br>n=1           | 90<br>n=1             | NA                   | NA                 |

Data are presented as median (IQ-range) unless other is specified. DAH; Diffuse alveolar haemorrhage, IPH; Idiopathic pulmonary Hemosiderosis, chILD; Childhood Interstitial Lung Disease, FEV1; Forced Expiratory Volume in the first second, FVC; Forced Vital Capacity, TLC; Total Lung Capacity, DLCO; the diffusion capacity for Carbon Monoxide, VA; Alveolar Volume. n = the number of patients in which the data was available, yrs; years.

Table 7S. Description of patients who have passed away

| Diagnoses                                 | Age at debut, years | Gender | Cause of death                             | Age at time of death, years | Period from debut to time of death | Medical treatment                                                                                            |                            |
|-------------------------------------------|---------------------|--------|--------------------------------------------|-----------------------------|------------------------------------|--------------------------------------------------------------------------------------------------------------|----------------------------|
|                                           |                     |        |                                            |                             |                                    | Type of medication                                                                                           | Months of treatment        |
| IPH                                       | 7.0 years           | Female | Acute bleeding                             | 7.4 years                   | 4.0 months                         | Methylprednisolone, iv<br>Prednisolone, po<br>Azathioprine, po                                               | NA<br>NA<br>NA             |
| IPH                                       | 7.5 years           | Female | Acute bleeding                             | 9 years                     | 18 months                          | Prednisolone, po                                                                                             | 9 (8030 mg)                |
| IPH                                       | 2.8 years           | Female | Acute bleeding                             | 4.9 years                   | 1.9 years                          | Prednisolone, po                                                                                             | 12 (8800 mg)               |
| IPH                                       | 0.3                 | Female | Acute rejection after lung transplantation | NA                          | NA                                 | Methylprednisolone, iv<br>Prednisolone, po<br>Hydroxychloroquine, po<br>Cyclosporine                         | NA<br>NA<br>NA<br>NA       |
| IPH                                       | 9.3                 | Female | Chronic respiratory failure                | 13.3 years                  | 4.0 years                          | Methylprednisolone, iv<br>Prednisolone, po<br>Hydroxychloroquine, po<br>Azathioprine, po<br>Cyclophosphamide | NA<br>46<br>39<br>6<br>NA  |
| Anti-glomerular basement membrane disease | 12.8                | Female | Chronic respiratory failure                | 12.9 years                  | 1 month                            | Methylprednisolone, iv<br>Hydroxychloroquine, po<br>Cyclophosphamide                                         | 1<br>155<br>NA             |
| STAT-3 mutation                           | 2.0                 | Male   | Died after lung transplantation            | 14.8 years                  | 12.8 years                         | Methylprednisolone, iv<br>Prednisolone, po<br>Hydroxychloroquine, po<br>Etanercept<br>Mycophenolate mofetil  | NA<br>NA<br>NA<br>NA<br>NA |
| Pulmonary interstitial glycogenosis (PIG) | 0.0                 | Male   | Multiorgan failure                         | 0.05                        | 0.5 months                         | Methylprednisolone, iv                                                                                       | 1                          |
| Lung fibrosis                             | 5.8 years           | Male   | Chronic respiratory failure                | 14.9 years                  | 9.1 years                          | Methylprednisolone, iv<br>Prednisolone, po<br>Immunoglobulins<br>Azathioprine, po<br>Tocilizumab             | NA<br>109<br>NA<br>3<br>NA |

|                                                         |            |        |                                                                                |            |            |                                                     |                 |
|---------------------------------------------------------|------------|--------|--------------------------------------------------------------------------------|------------|------------|-----------------------------------------------------|-----------------|
| Pulmonary hemorrhage with cow's milk antibody (IgG)     | 8 months   | Female | Acute bleeding                                                                 | 11 months  | 3 months   | Other                                               |                 |
| Cantu-syndrome                                          | 9 months   | Male   | Pulmonary infection                                                            | 3.3 years  | 2.4 years  | methylprednisolone, iv<br>Prednisolone, po<br>Other | 28 months<br>NA |
| DAH associated with autoimmune features (ANCA positive) | 15.2 years | Male   | Pulmonary aspergillosis                                                        | 16.7 years | 18 months  | methylprednisolone, iv<br>Cyclophosphamide          | 1<br>NA         |
| DAH developed secondary to infection                    | 9 months   | Male   | Pulmonary infection                                                            | 2.5 years  | 22 months  | methylprednisolone, iv                              | 1               |
| Bone marrow transplant-related lung injury              | 14.3 years | Female | DAH/idiopathic pneumonia syndrome after allogeneic bone marrow transplantation | 15.6 years | 16 months  | Other                                               | NA              |
| non-specified DAH diagnosis                             | 17 years   | Male   | Pulmonary aspergillosis                                                        | 17.4 years | 3.6 months | NA                                                  | NA              |

DAH; Diffuse alveolar haemorrhage, IPH; Idiopathic pulmonary Hemosiderosis, ANCA; Anti-neutrophil cytoplasm antibodies.
